# Supplementary material for: RIAM: A Universal Accessible Protocol for the Isolation of High Purity DNA from Various Soils and Other Humic Substances
Source: MDPI journal article supplement (doi:10.3390/mps5060099), 2022-12-16
Supplement: s1 [file s1]

## Supplementary Material

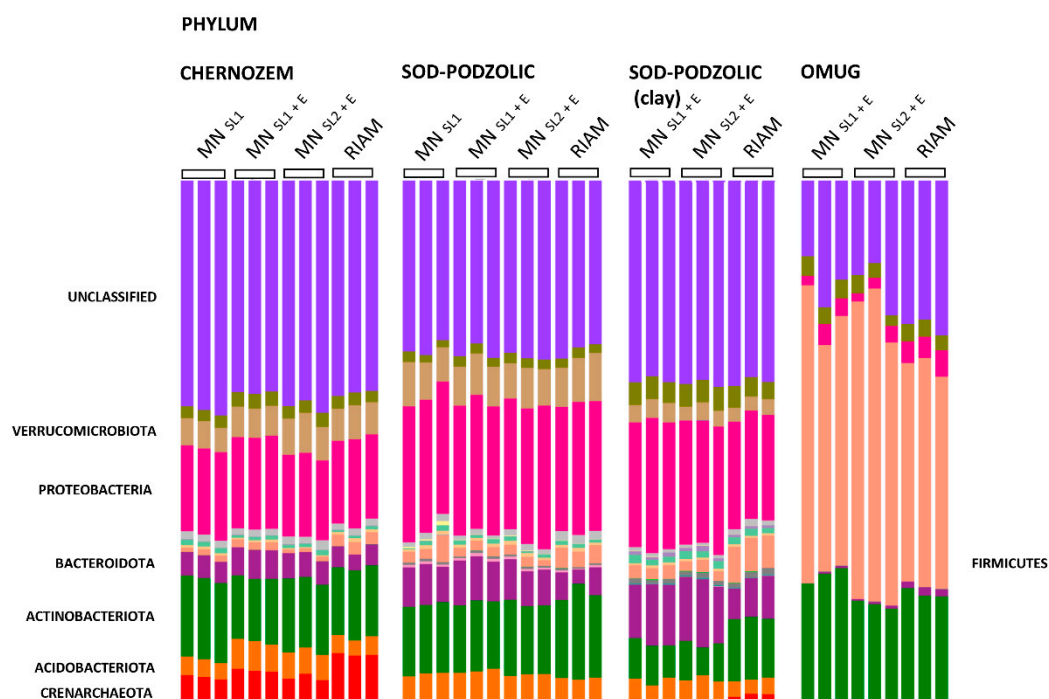

**Figure S1.** Taxonomy bargraphs, phylum level. Only major taxa named.

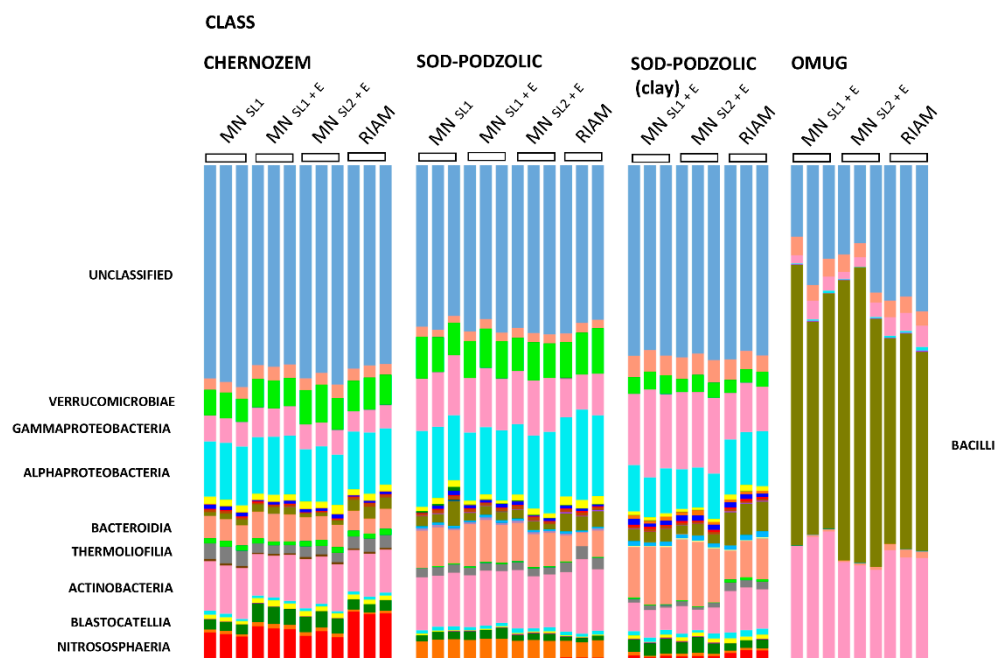

**Figure S2.** Taxonomy bargraphs, class level. Only major taxa named.

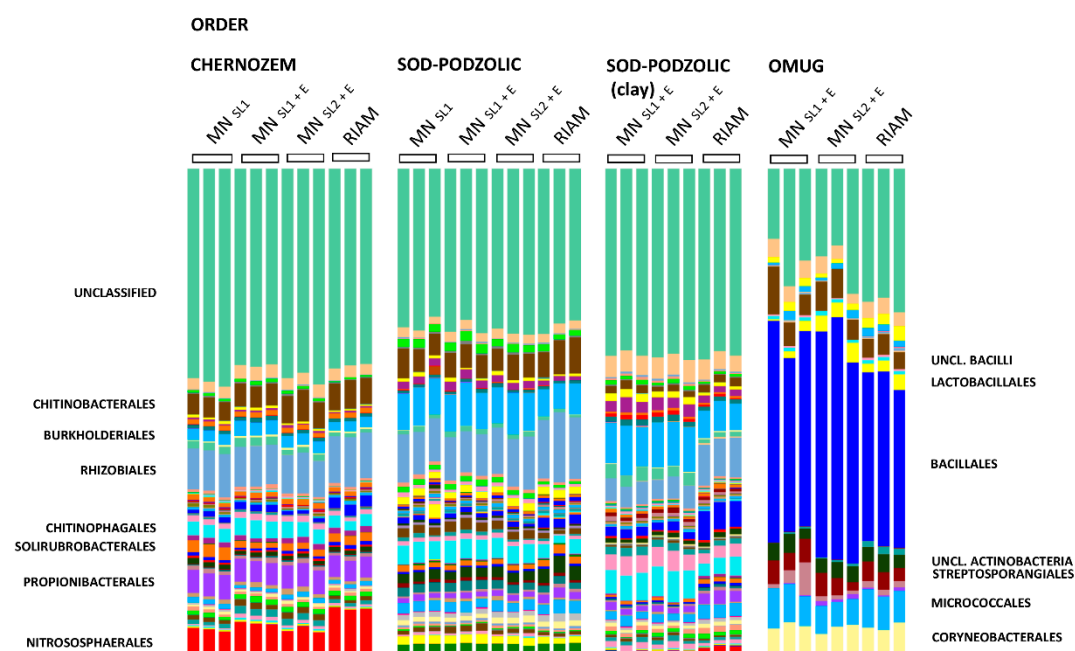

**Figure S3.** Taxonomy bargraphs, order level. Only major taxa named.

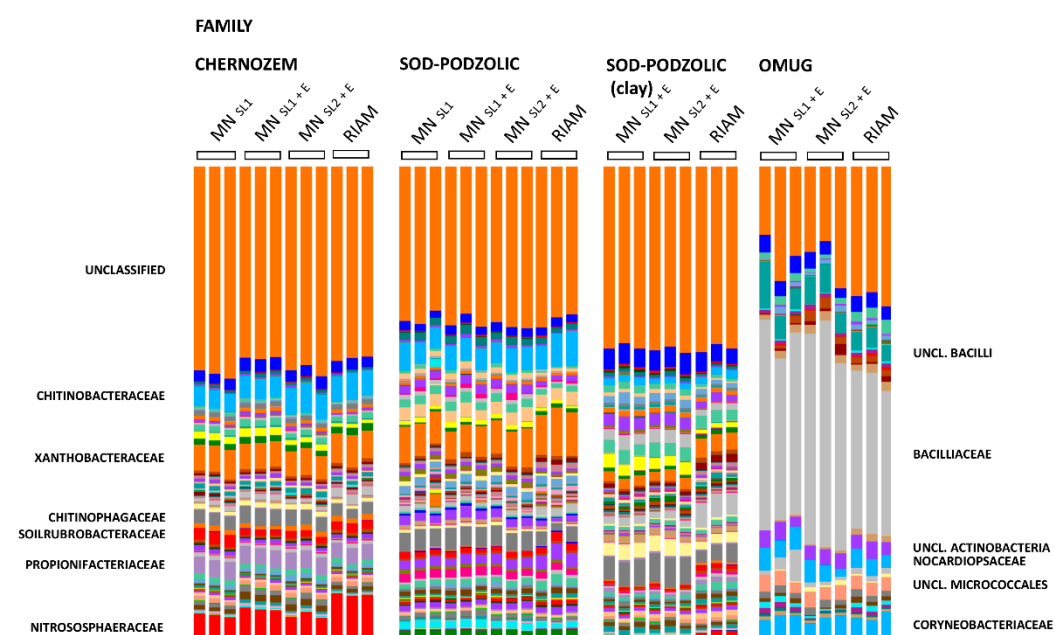

**Figure S4.** Taxonomy bargraphs, family level. Only major taxa named.

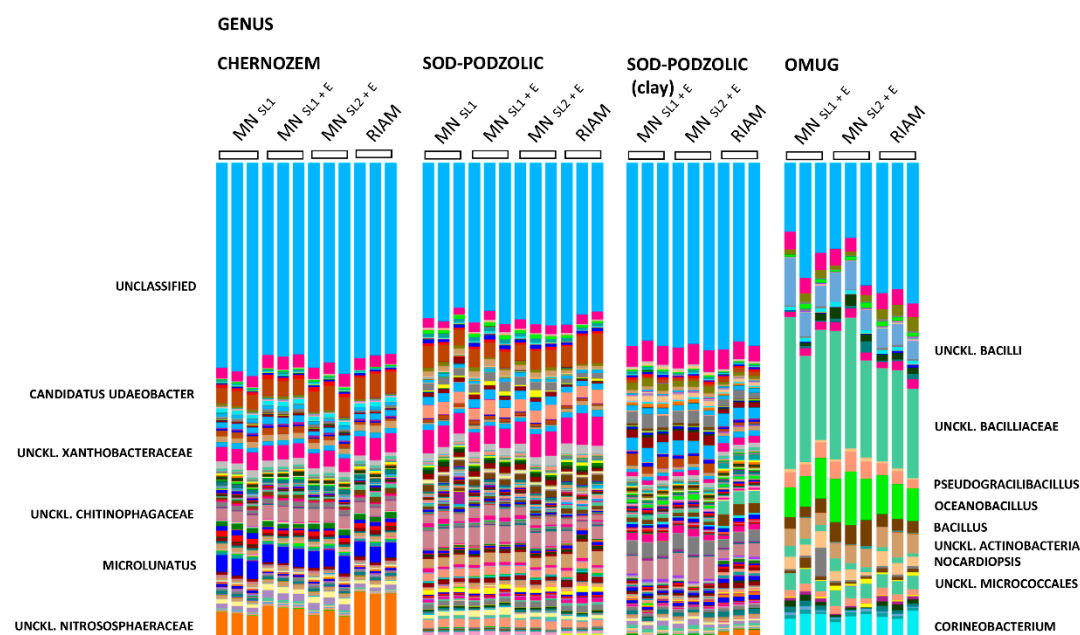

**Figure S5.** Taxonomy bargraphs, genus level. Only major taxa named.

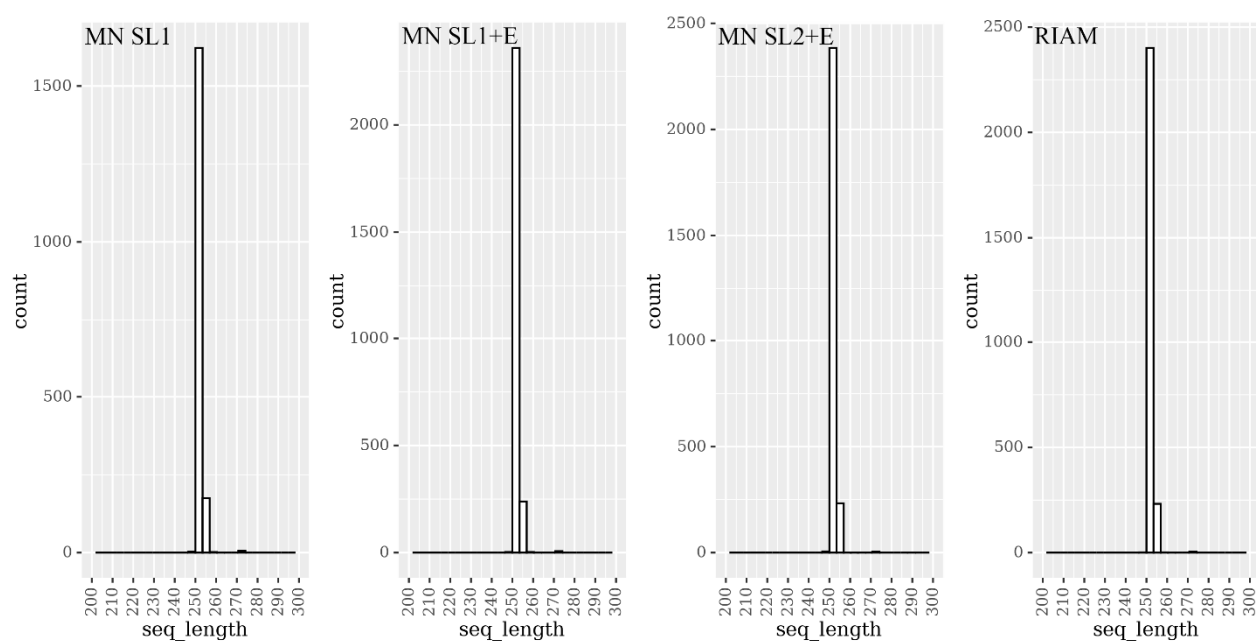

**Figure S6.** Sequence length distribution in 16S rRNA gene libraries.

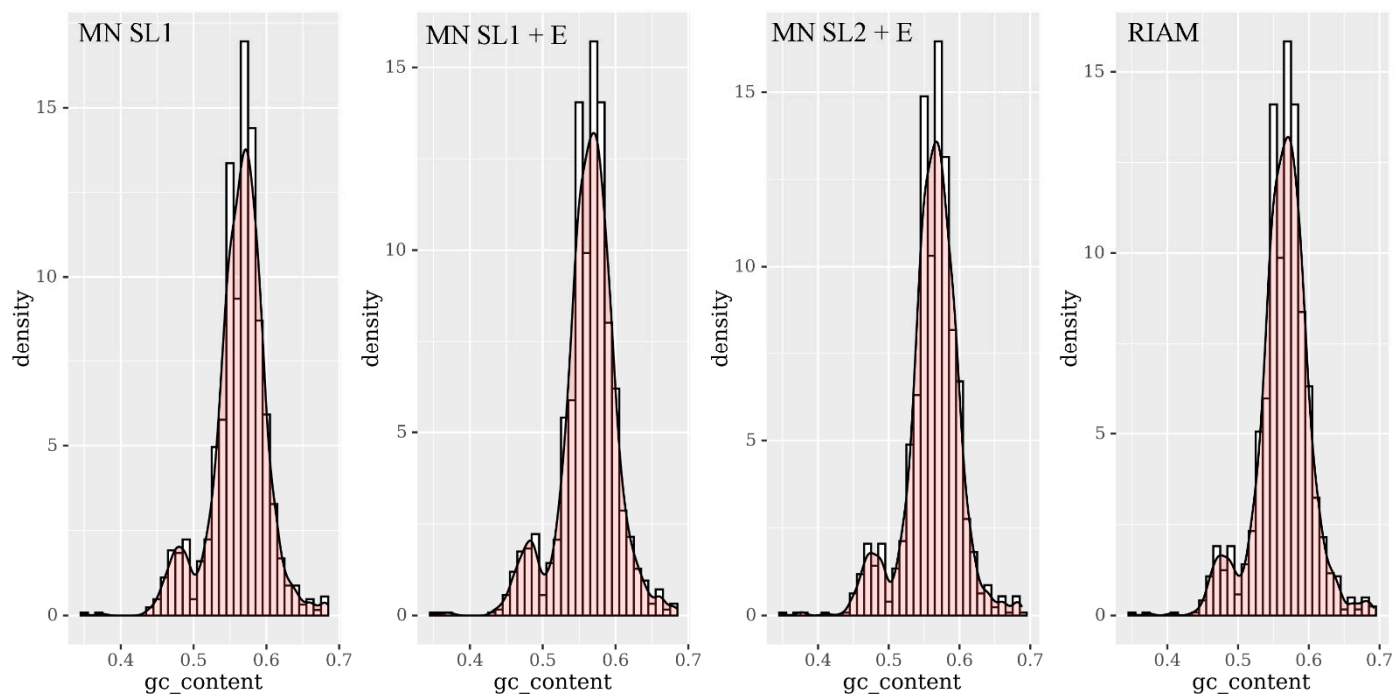

**Figure S7.** GC content distribution in 16S rRNA gene libraries.
